# Supplementary material for: Radon and lung cancer risk
Source: PubMed Central journal article supplement — CMAJ. 2023 Jun 19;195(24):E850. doi: 10.1503/cmaj.230110 (PMC10281200; doi:10.1503/cmaj.230110), 2023-06-19
Supplement: 230110-five-1-at.pdf [file 230110-five-1-at.pdf]

## Appendix:

### Physician Continuing Professional Development radon activities:

1. McMaster University offers a free one-hour [module on radon](#) through machealth. The site offers a fact sheet for professionals as well as patient resources.
2. This Changed My Practice (UBC CPD). [Radon: a preventable cause of lung cancer.](#)

### Patient resources:

- HealthHQ from McMaster University offers a [one stop shop radon education](#) for patients including printable fact sheets and brochures.
- Citizen Science National research project <https://evictradon.org> distributes radon tests kits at cost and offers a free online radiation exposure calculator tool at <https://evictradon.org/radon-exposure-calculator/>

### Obtaining a long-term Alpha Track radon test detector:

- [Take Action on Radon](#) (TAOR) is a national initiative funded by Health Canada that enables the order of a long-term radon detector kit online for a cost.
- Free detectors may be accessed through local initiatives like the TAOR [100-Kit Challenge](#) that provides up to 100 test kits for free hand-out by municipalities. Physicians can contact TAOR to operate a 100-Kit Challenge in their community.
- If purchased at a hardware store, make sure the kit is long-term, and that the price includes laboratory analysis.

### Professional radon measurement and mitigation:

- The [Canadian National Radon Proficiency Program](#) (C-NRPP) provides contact information for radon measurement and mitigation professionals
